# Supplementary material for: Preventing Onset of Anxiety Disorders in Offspring of Anxious Parents: A Randomized Controlled Trial of a Family-Based Intervention
Source: Atypon-hosted journal article supplement (doi:10.1176/appi.ajp.2015.14091178), 2015-09-25
Supplement: appi.ajp.2015.14091178.ds001.pdf [file appi.ajp.2015.14091178.ds001.pdf]

### CONSORT Diagram

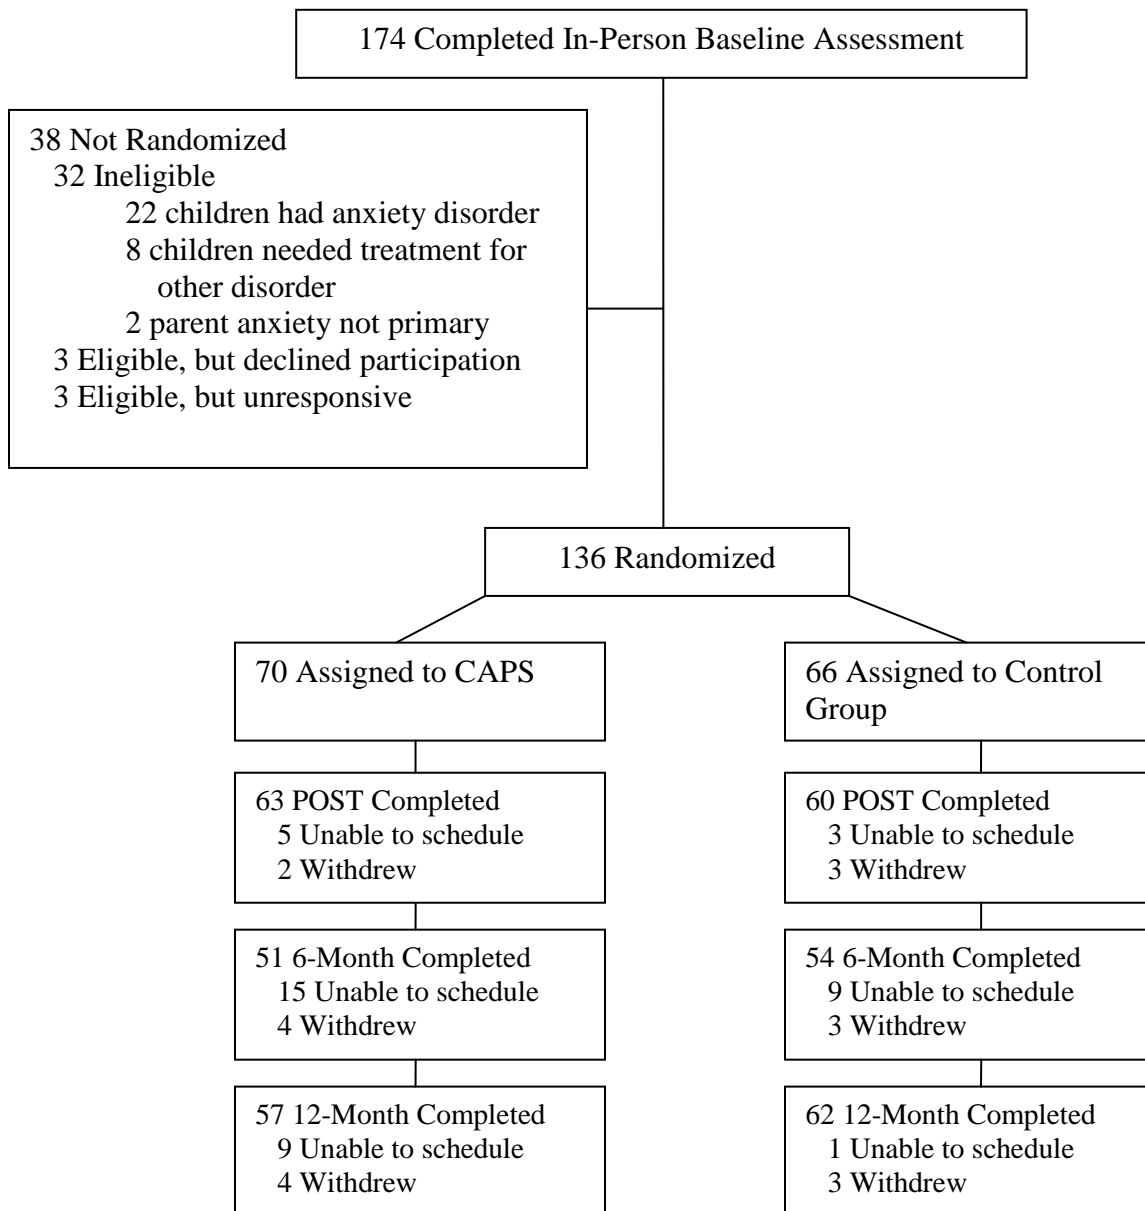

TABLE S1. Children in the Coping and Promoting Strength Program and Information-Monitoring Groups Meeting Diagnostic Criteria for an Anxiety Disorder at Each Follow-Up Assessment, and Cumulatively<sup>a</sup>

| Assessment       | Coping and Promoting Strength Program Group |      | Information-Monitoring Control Group                             |       |
|------------------|---------------------------------------------|------|------------------------------------------------------------------|-------|
|                  | N                                           | %    | N                                                                | %     |
| Postintervention | 0                                           | 0.00 | 5 (1 SOP, 4 GAD)                                                 | 8.33  |
| 6 Months         | 2 (1 GAD, 1 SAD)                            | 3.92 | 7 (1 SOP, 3 GAD, 1 SAD, 1 OCD, 1 SP)                             | 13.72 |
| 12 Months        | 1 (1 GAD)                                   | 1.81 | 7 (1 SOP, 3 GAD, 2 SAD, 1 PD)                                    | 14.00 |
| Cumulative cases | 3 (2 GAD, 1 SAD)                            | 5.26 | 19 (3 SOP, 10 GAD, 3 SAD, 1 OCD, 1 SP, 1 PD without agoraphobia) | 30.65 |

<sup>a</sup> GAD=generalized anxiety disorder; SOP=social phobia; SP=specific phobia; SAD=separation anxiety disorder; OCD=obsessive-compulsive disorder; PD=panic disorder.
