# Supplementary material for: Preventing Onset of Anxiety Disorders in Offspring of Anxious Parents: A Randomized Controlled Trial of a Family-Based Intervention
Source: Atypon-hosted journal article supplement (doi:10.1176/appi.ajp.2015.14091178), 2015-09-25
Supplement: appi.ajp.2015.14091178.ds001.pdf [file appi.ajp.2015.14091178.ds001.pdf]

 


Psychiatry Online
